# Supplementary material for: Circulating miRNA-21 is an innovative biomarker for cardiovascular events in erectile dysfunction patients
Source: Frontiers journal article supplement (doi:10.3389/fcvm.2024.1301925), 2024-03-21
Supplement: Data_Sheet_1.pdf [file Data_Sheet_1.pdf]

### Supplementary material

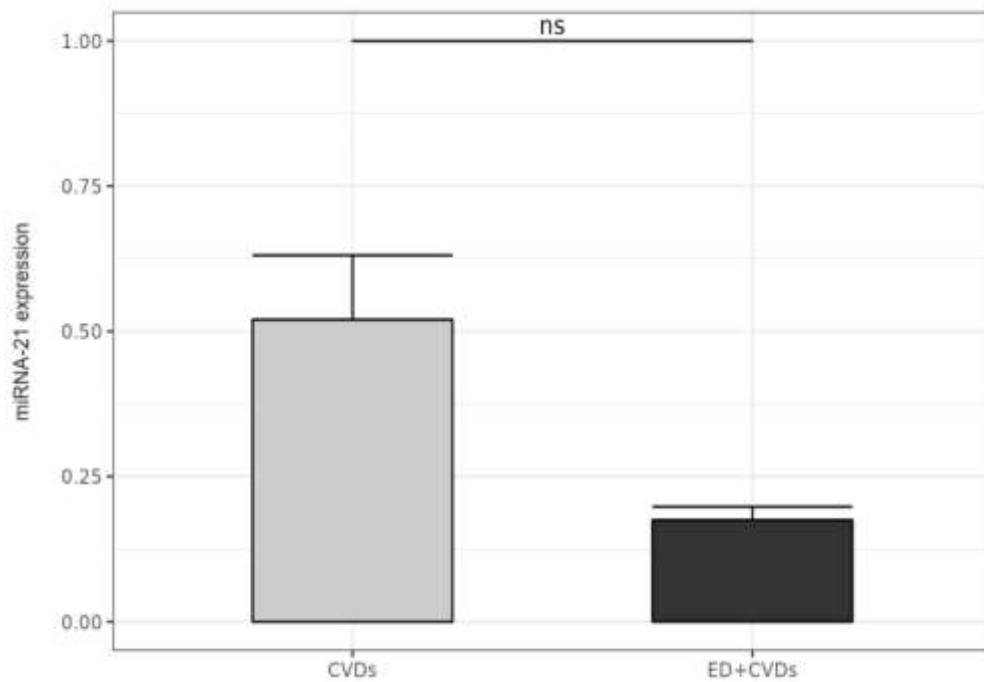

**Figure S1.** Enhanced plot of Figure 1: relative expression of miRNA-21 between patients with cardiovascular disease (CVDs) and patients with both pathologies (ED + CVDs); ns: not significant.

**Table S1.** MicroRNA-21 and RNU6B (endogenous control) expression. Data obtained by qPCR to determine the relative expression of miRNA-21 by  $2^{-\Delta\Delta C_t}$  method [22], of the patients in group 1 – control erectile dysfunction (ED); 2 – control cardiovascular diseases (CVDs); 3 – cases with both pathologies.

|                                        | Control Erectile Dysfunction (ED) | Control Cardiovascular diseases (CVDs) | Cases ED + CVDs |
|----------------------------------------|-----------------------------------|----------------------------------------|-----------------|
| <b>miRNA-21 expression (mean (SD))</b> | 23 (6)                            | 27 (3)                                 | 30 (1) *+       |
| <b>RNU6B expression (mean (SD))</b>    | 31 (2)                            | 33 (1)                                 | 35 (1)          |

\*:  $p < 0.05$  between the control erectile dysfunction patients (ED) vs. cases; +:  $p < 0.05$  between the control cardiovascular disease patients (CVDs) vs. cases.
